# Supplementary material
Source: publisher figshare collection journal article supplement (https://acs.figshare.com/ndownloader/files/17929934)
Supplement: Supplementary file 1 [file 17929934]

# Supporting Information

## **Tunable Subradiant Mode in Free-Standing Metallic Nanohole**

### **Arrays for High-Performance Plasmo-fluidic Sensing**

Anran Li,<sup>†</sup> Xiaotian Wang,<sup>\*,†</sup> Lin Guo,<sup>\*,†</sup> Shuzhou Li<sup>\*,‡</sup>

<sup>†</sup>Beijing Advanced Innovation Center for Biomedical Engineering, School of Chemistry, Beihang University, Beijing 100191, Beijing, P. R. China.

<sup>‡</sup>School of Materials Science and Engineering, Nanyang Technological University, Singapore 639798, Singapore.

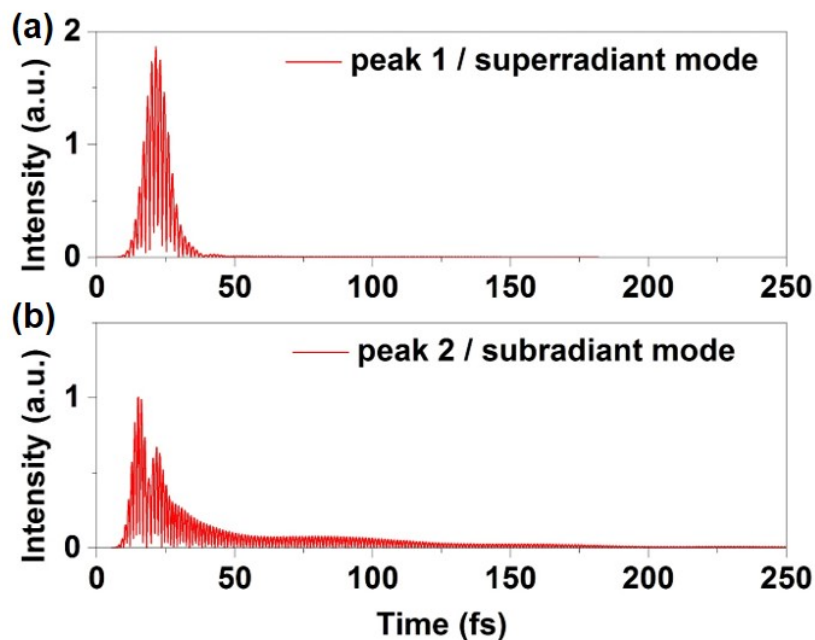

**Figure S1.** Temporal evolutions of the simulated electric field intensity for the peak 1/superradiant (a) and peak 2/subradiant (b) modes of the free-standing Ag hexagonal NA ( $p= 580$  nm,  $r=180$  nm,  $t= 100$ nm).

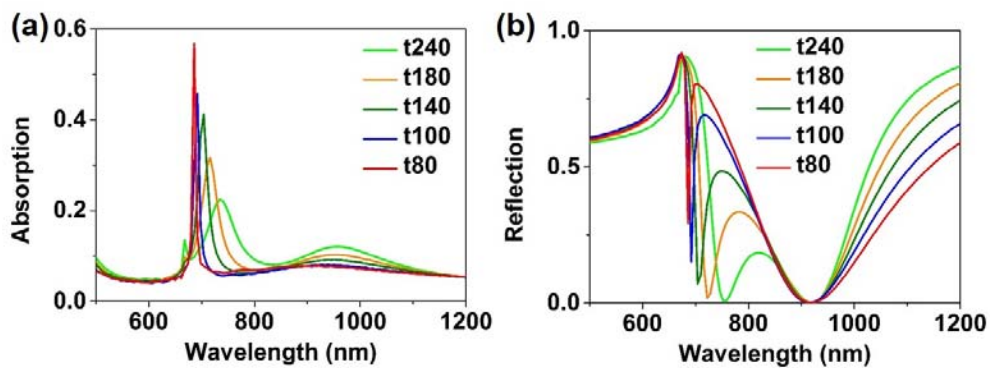

**Figure S2.** Absorption (a) and reflection (b) spectra of the free-standing Ag hexagonal NAs ( $p= 580$  nm,  $r=180$  nm) with various film thicknesses  $t$ .

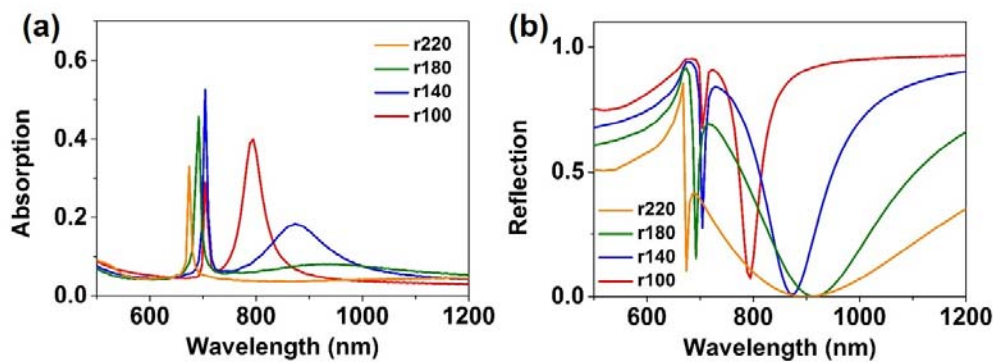

**Figure S3.** Absorption (a) and reflection (b) spectra of the free-standing Ag hexagonal NAs ( $p=580$  nm,  $t=100$  nm) with various hole sizes  $r$ .

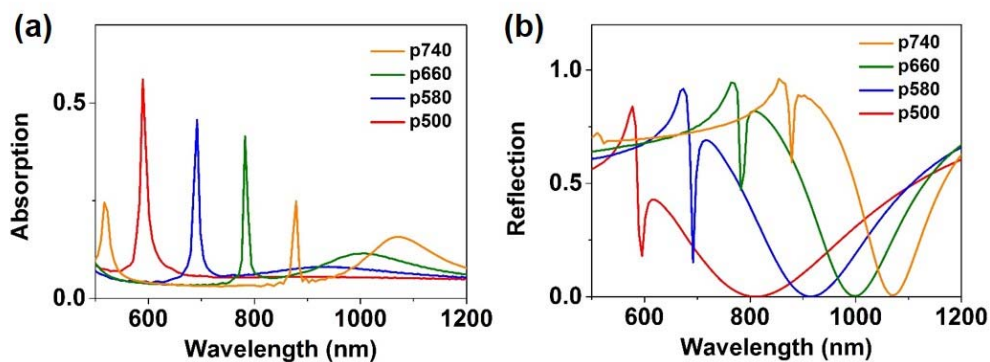

**Figure S4.** Absorption (a) and reflection (b) spectra of the free-standing Ag hexagonal NAs ( $t=100$  nm,  $r=180$  nm) with various periodicities  $p$ .

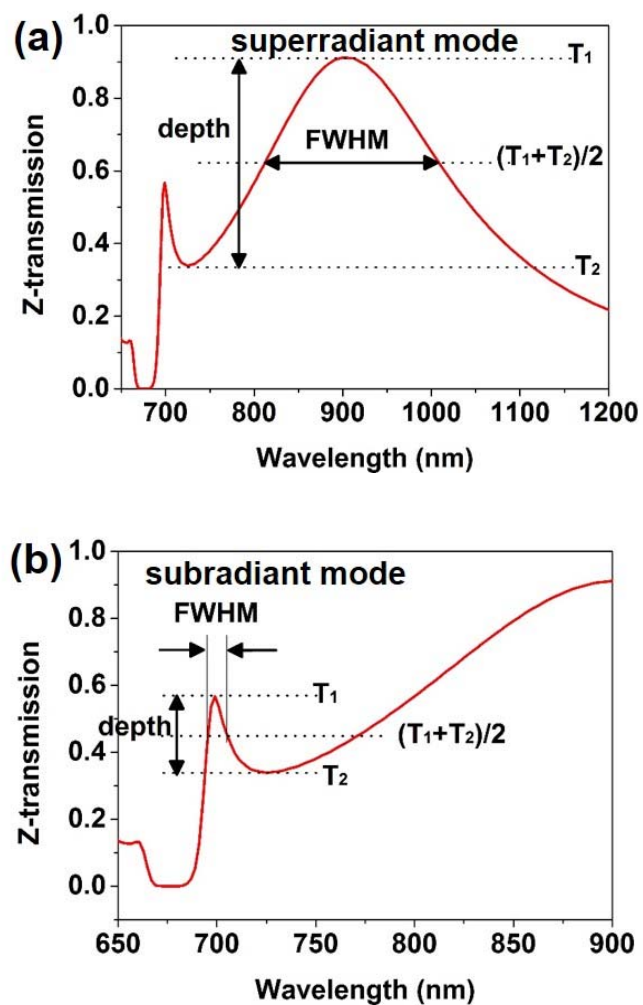

**Figure S5.** Determination of the FWHM and depth of the superradiant mode (a) and the subradiant mode (b).

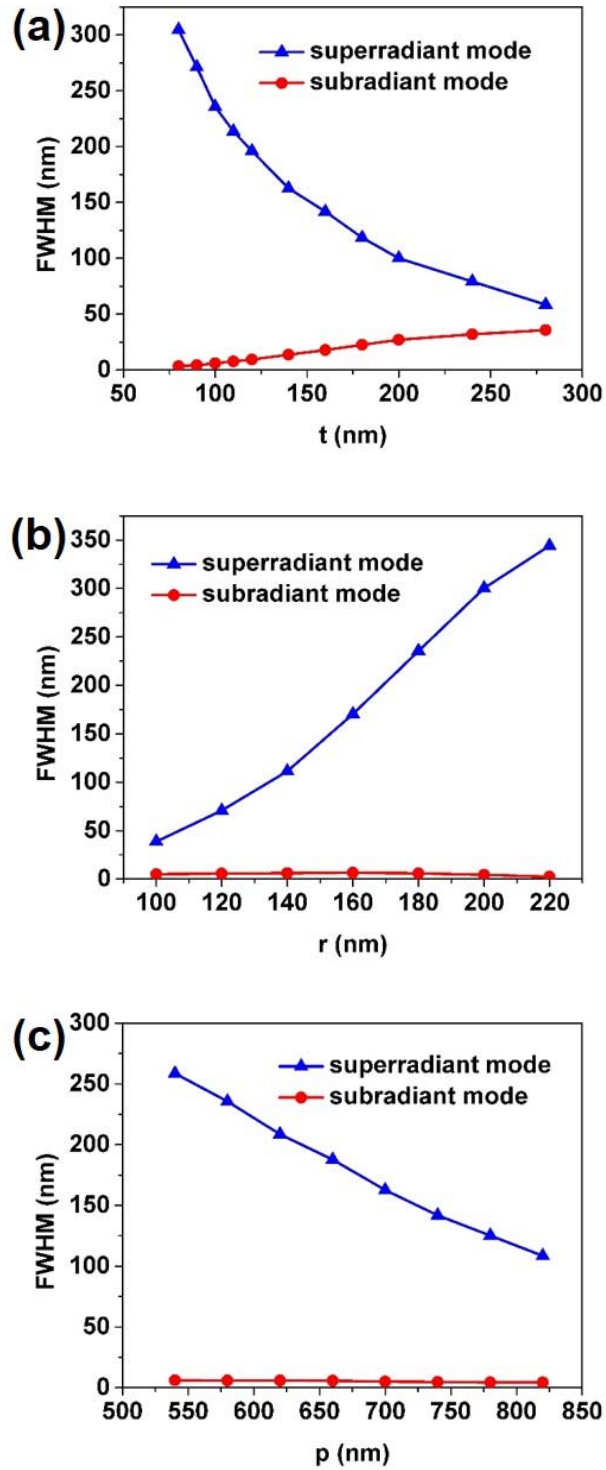

**Figure S6.** FWHM of the superradiant mode and the subradiant mode in free-standing Ag NAs as a function of (a) film thickness  $t$  ( $p=580$  nm,  $r=180$  nm), (b) hole radius  $r$  ( $p=580$  nm,  $t=100$  nm), and (c) lattice periodicity  $p$  ( $t=100$  nm,  $r=180$  nm).

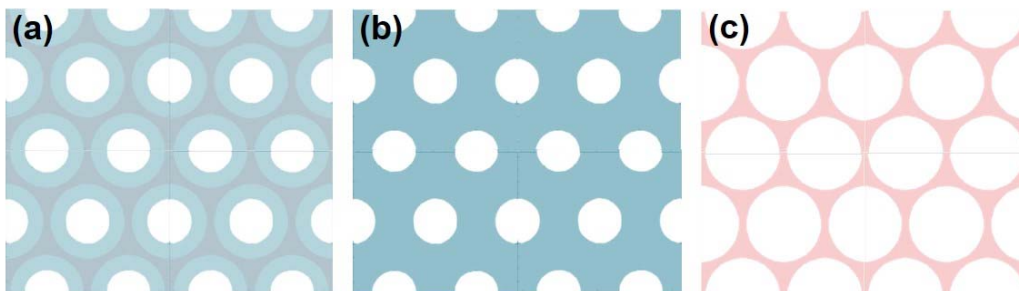

**Figure S7.** Schematic illustrations of the top views of (a) silver NAs placed on top of a free-standing  $\text{SiO}_2$  membrane with through holes, (b) silver NAs, and (c)  $\text{SiO}_2$  membrane with through holes.
